# Supplementary material for: SPEAQeasy: a scalable pipeline for expression analysis and quantification for R/bioconductor-powered RNA-seq analyses
Source: PubMed Central journal article supplement (PMC8088074; doi:10.1186/s12859-021-04142-3), 2021-05-01

# Sample\_2914

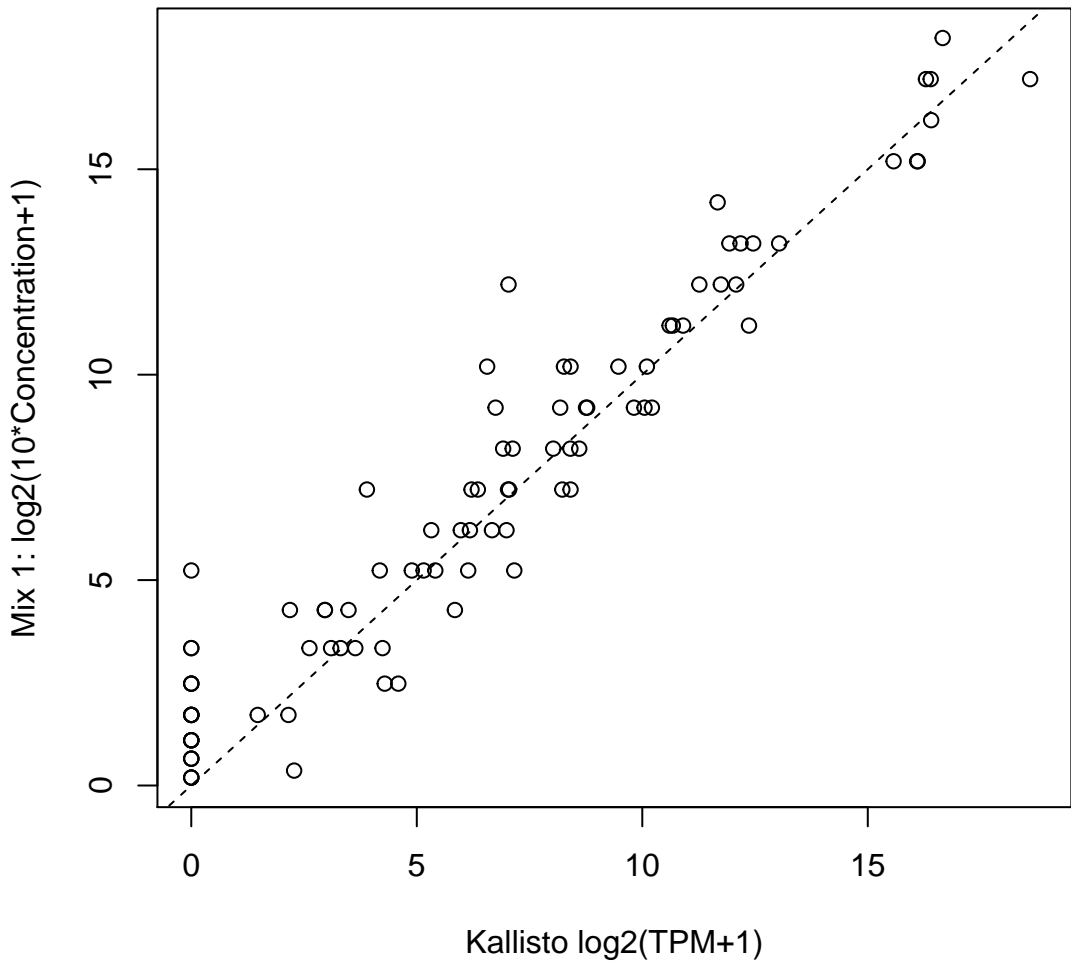

Supplement: 12859_2021_4142_MOESM1_ESM.pdf [file 12859_2021_4142_MOESM1_ESM.pdf]
